# Supplementary material for: Antimicrobial and Antibiofilm Activities of the Fungal Metabolites Isolated from the Marine Endophytes Epicoccum nigrum M13 and Alternaria alternata 13A
Source: MDPI journal article supplement (doi:10.3390/md19040232), 2021-04-20
Supplement: s1 [file s1]

# Supplementary Information

## Antimicrobial and antibiofilm activities of the fungal metabo-lites isolated from the marine endophytes *Epicoccum nigrum* M13 and *Alternaria alternata* 13A

M. Mallique Qader <sup>1,2,‡</sup>, Ahmed A. Hamed <sup>3,‡</sup>, Sylvia Soldatou <sup>4</sup>, Mohamed Abdelraof <sup>3</sup>, Mohamed E. El-awady <sup>5</sup>, Ahmed S. I. Hassane <sup>1,6</sup>, Lassaad Belbahri <sup>7</sup>, Rainer Ebel <sup>4,\*</sup>, Mostafa E. Rateb <sup>1,\*</sup>

- <sup>1</sup> School of Computing, Engineering, & Physical Sciences, University of the West of Scotland, Paisley PA1 2BE, Scotland, UK  
<sup>2</sup> National Institute of Fundamental Studies, Hantana Road, Kandy 20000, Sri Lanka  
<sup>3</sup> Microbial Chemistry Department, National Research Centre, 33 El-Buhouth Street, P.O. Box 12622, Dokki, Giza, Egypt  
<sup>4</sup> Marine Biodiscovery Centre, Department of Chemistry, University of Aberdeen, Aberdeen AB24 3UE, Scotland, UK  
<sup>5</sup> Microbial Biotechnology Department, National Research Centre, National Research Centre, 33 El-Buhouth Street, P.O. Box 12622, Dokki, Giza, Egypt  
<sup>6</sup> Aberdeen Royal Infirmary, Foresterhill health campus, Aberdeen AB25 2ZN, Scotland, UK  
<sup>7</sup> Laboratory of Soil Biology, University of Neuchatel, 2000 Neuchatel, Switzerland

\* Correspondence: Rainer Ebel and Mostafa E. Rateb

### Table

**Table S1:** Chemical shift difference of (S)-MTPA and (R)-MTPA ester of **6** (pyridine-*d*<sub>5</sub> at 298 K)

### Figures

**Figure S1:** <sup>1</sup>H NMR spectrum of compound **1** (600 MHz, DMSO- *d*<sub>6</sub>, 298 K)

**Figure S2:** <sup>13</sup>C NMR spectrum of compound **1** (150 MHz, DMSO- *d*<sub>6</sub>, 298 K)

**Figure S3:** <sup>1</sup>H-<sup>1</sup>H COSY spectrum of compound **1**

**Figure S4:** HSQC spectrum of compound **1**

**Figure S5:** HMBC spectrum of compound **1**

**Figure S6:** <sup>1</sup>H NMR spectrum of compound **2** (600 MHz, DMSO- *d*<sub>6</sub>, 298 K)

**Figure S7:** <sup>1</sup>H NMR spectrum of compound **3** (600 MHz, DMSO- *d*<sub>6</sub>, 298 K)

**Figure S8:** <sup>1</sup>H NMR spectrum of compound **4** (600 MHz, DMSO- *d*<sub>6</sub>, 298 K)

**Figure S9:** <sup>1</sup>H NMR spectrum of compound **5** (600 MHz, DMSO- *d*<sub>6</sub>, 298 K)

**Figure S10:** <sup>1</sup>H NMR spectrum of compound **6** (600 MHz, DMSO- *d*<sub>6</sub>, 298 K)

**Figure S11:** HRESIMS spectrum of compound **7**

**Figure S12:** <sup>1</sup>H NMR spectrum of compound **7** (600 MHz, DMSO- *d*<sub>6</sub>, 298 K)

**Figure S13:** <sup>13</sup>C NMR spectrum of compound **7** (600 MHz, DMSO- *d*<sub>6</sub>, 298 K)

**Figure S14:** HSQC spectrum of compound **7**

**Figure S15:** <sup>1</sup>H-<sup>1</sup>H COSY spectrum of compound **7**

**Figure S16:** HMBC spectrum of compound **7**

**Figure S17:** HRESIMS spectrum of compound **8**

**Figure S18:**  $^1\text{H}$  NMR spectrum of compound **8** (600 MHz, DMSO-  $d_6$ , 298 K)

**Figure S19:**  $^{13}\text{C}$  NMR spectrum of compound **8** (600 MHz, DMSO-  $d_6$ , 298 K)

**Figure S20:** HSQC spectrum of compound **8**

**Figure S21:**  $^1\text{H}$ - $^1\text{H}$  COSY spectrum of compound **8**

**Figure S22:** HMBC spectrum of compound **8**

**Figure S23:**  $^1\text{H}$  NMR spectrum of compound **9** (600 MHz, DMSO-  $d_6$ , 298 K)

**Figure S24:**  $^1\text{H}$  NMR spectrum of compound **10** (600 MHz, DMSO-  $d_6$ , 298 K)

**Figure S25:**  $^1\text{H}$  NMR spectrum of compound **11** (600 MHz, DMSO-  $d_6$ , 298 K)

**Figure S26:**  $^1\text{H}$  NMR spectrum of compound **12** (600 MHz, DMSO-  $d_6$ , 298 K)

**Figure S27:**  $^1\text{H}$  NMR spectrum of compound **13** (600 MHz, DMSO-  $d_6$ , 298 K)

**Figure S28:**  $^1\text{H}$  NMR spectrum of compound **14** (600 MHz, DMSO-  $d_6$ , 298 K)

**Figure S29:**  $^1\text{H}$  NMR spectrum of compound **15** (600 MHz, DMSO-  $d_6$ , 298 K)

**Figure S30:**  $^1\text{H}$  NMR spectrum of compound **16** (600 MHz, DMSO-  $d_6$ , 298 K)

### Table

**Table S1.** Chemical shift difference of (S)-MTPA and (R)-MTPA ester of **6** (pyridine- $d_5$  at 298 K)

| $\Delta\delta = (\delta_{\text{S-ester}} - \delta_{\text{R-Ester}})$ |                                 |                                 |       |              |
|----------------------------------------------------------------------|---------------------------------|---------------------------------|-------|--------------|
| C/H No                                                               | $\delta_{\text{S-Ester}}$ (ppm) | $\delta_{\text{R-Ester}}$ (ppm) | ppm   | Hz (500 MHz) |
| <b>3</b>                                                             | 4.79                            | 4.78                            | +0.01 | +5           |
| <b>6</b>                                                             | 4.68                            | 4.67                            | +0.01 | +5           |
| <b>9</b>                                                             | 2.31                            | 2.30                            | +0.01 | +5           |
| <b>10</b>                                                            | 0.86                            | 0.85                            | +0.01 | +5           |
| <b>11</b>                                                            | 1.27, 1.48                      | 1.25, 1.48                      | +0.02 | +10          |
| <b>12</b>                                                            | 1.13                            | 1.12                            | +0.01 | +5           |
| <b>8</b>                                                             | 1.66                            | 1.67                            | -0.01 | -5           |

## Figures

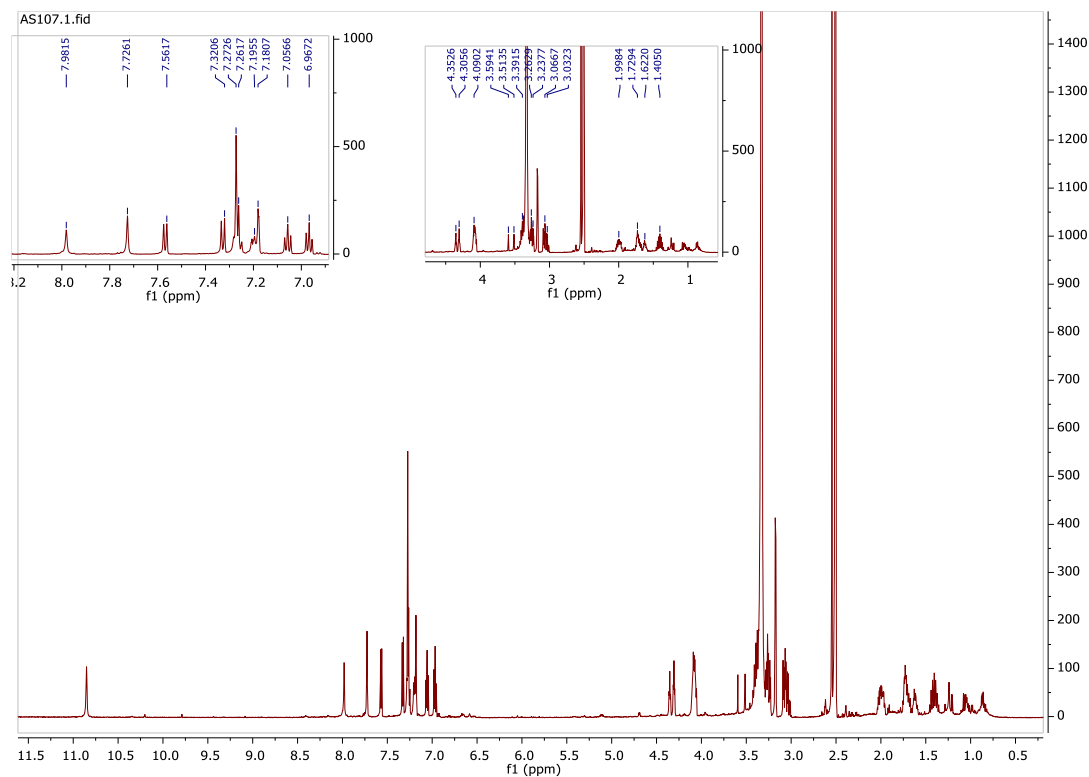

Figure S1:  $^1\text{H}$  NMR spectrum of compound 1 (600 MHz,  $\text{DMSO}-d_6$ , 298 K)

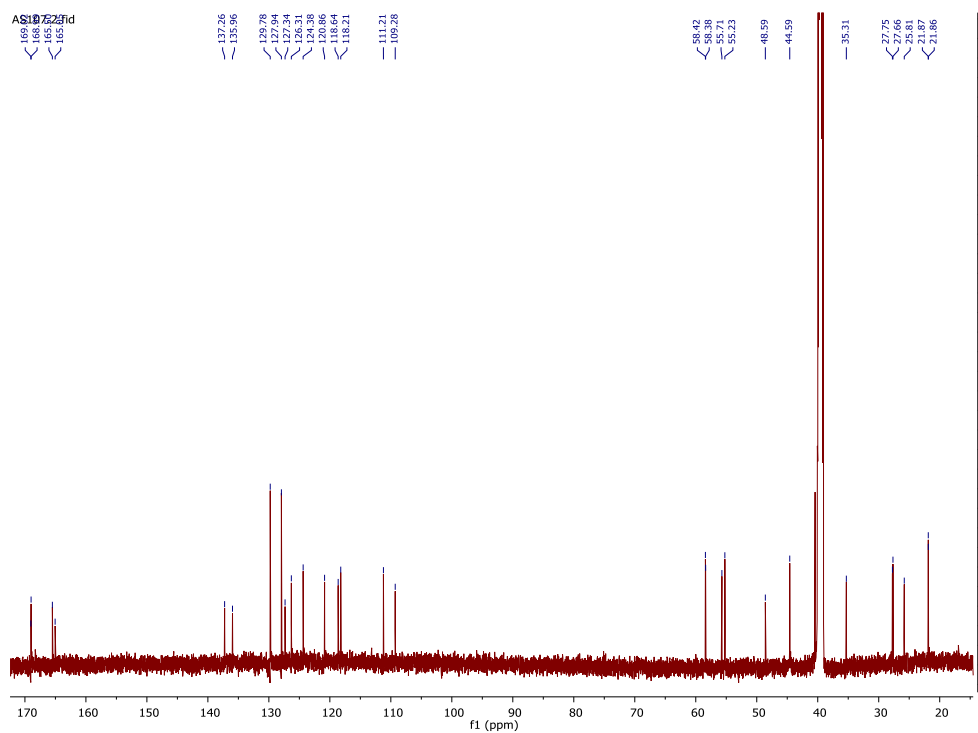

Figure S2:  $^{13}\text{C}$  NMR spectrum of compound 1 (150 MHz,  $\text{DMSO}-d_6$ , 298 K)

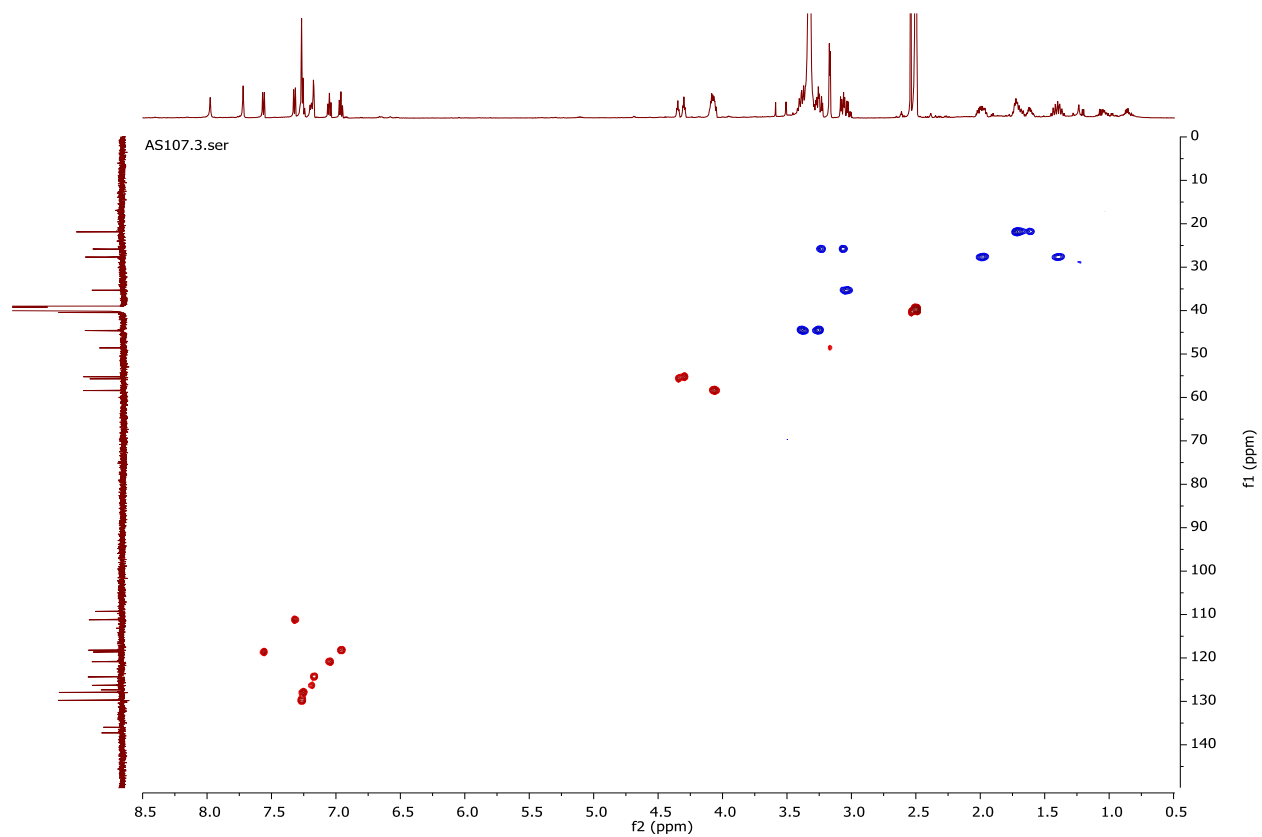

Figure S3: HSQC spectrum of compound 1 (DMSO- $d_6$ , 298 K)

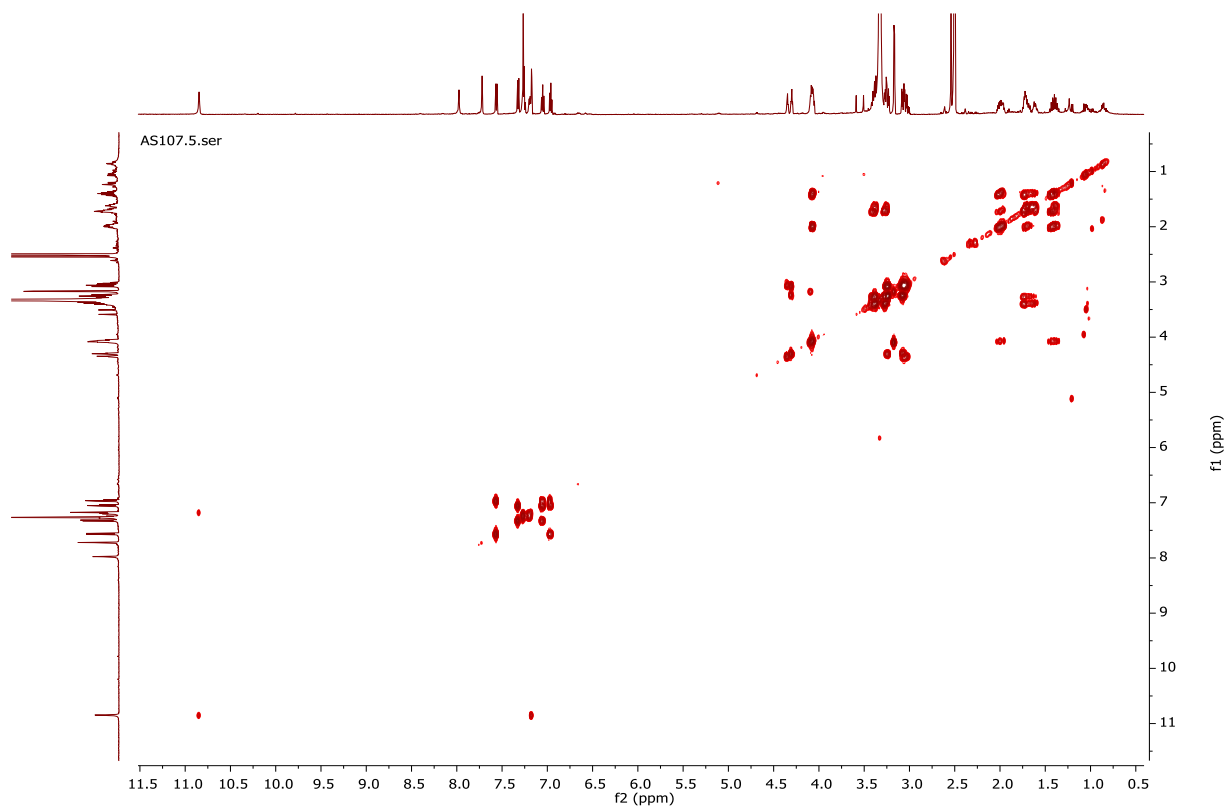

Figure S4:  $^1\text{H}$ - $^1\text{H}$  COSY spectrum of compound 1 (DMSO- $d_6$ , 298 K)

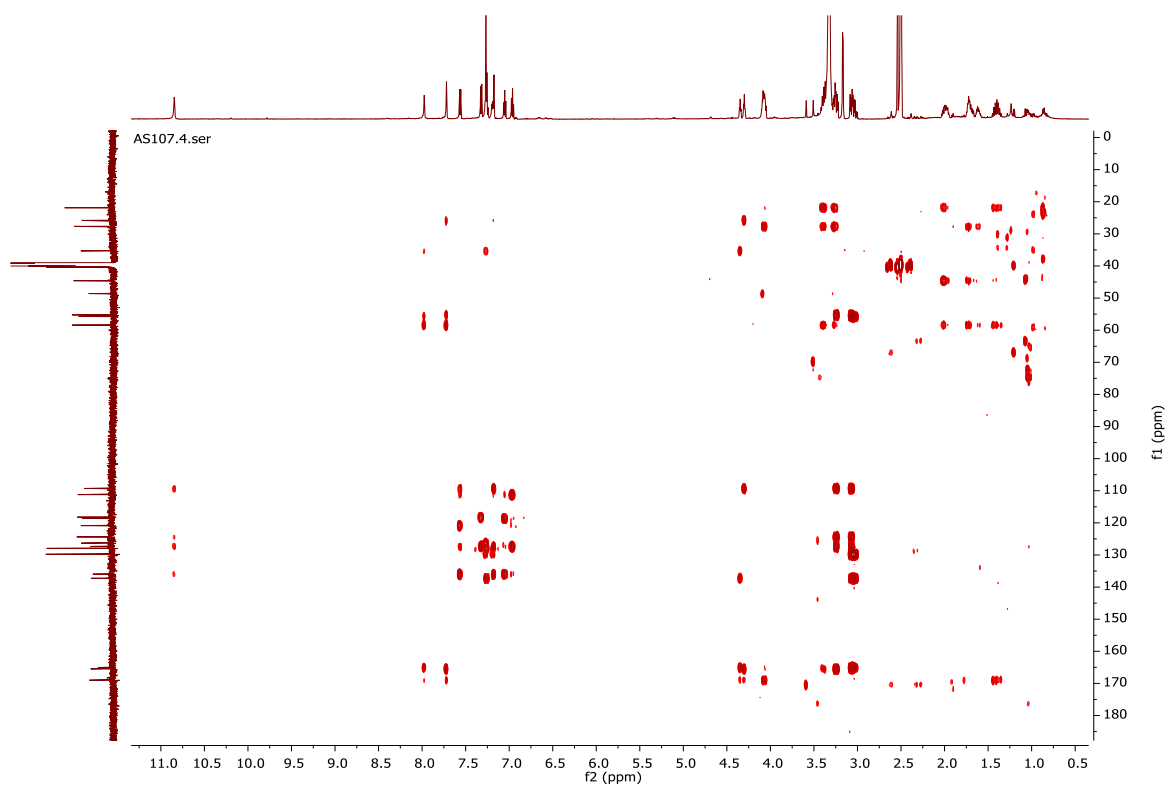

Figure S5: HMBC spectrum of compound **1** (DMSO- $d_6$ , 298 K)

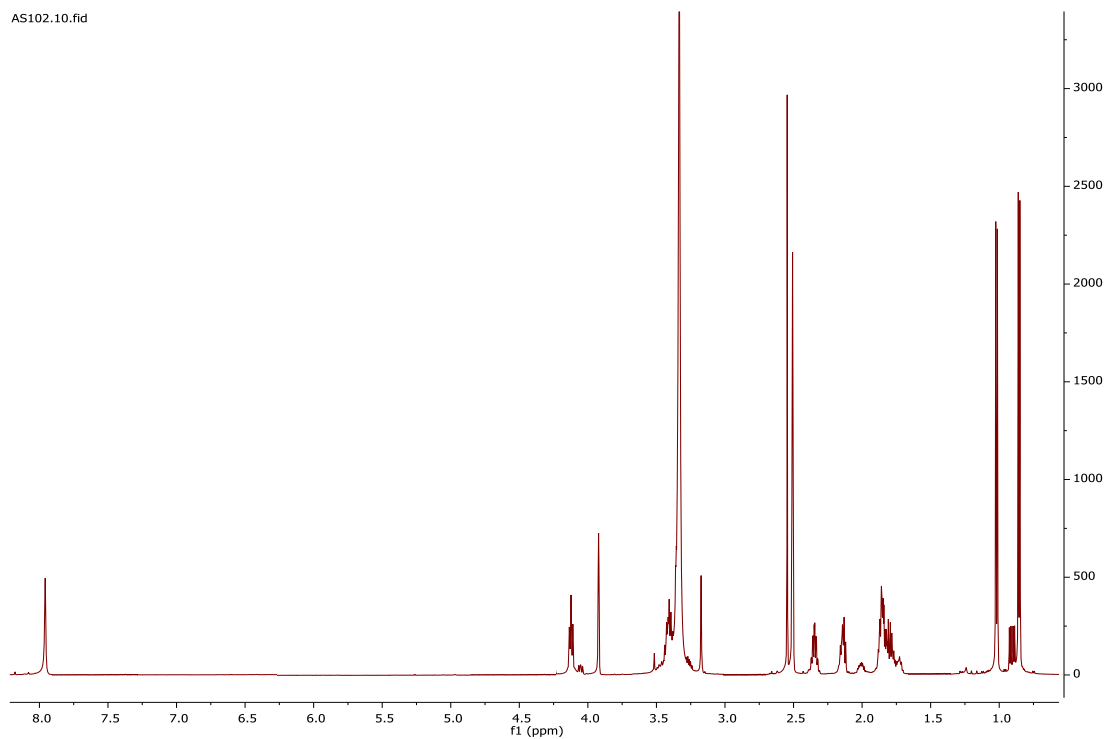

Figure S6:  $^1\text{H}$  NMR spectrum of compound **2** (600 MHz, DMSO- $d_6$ , 298 K)

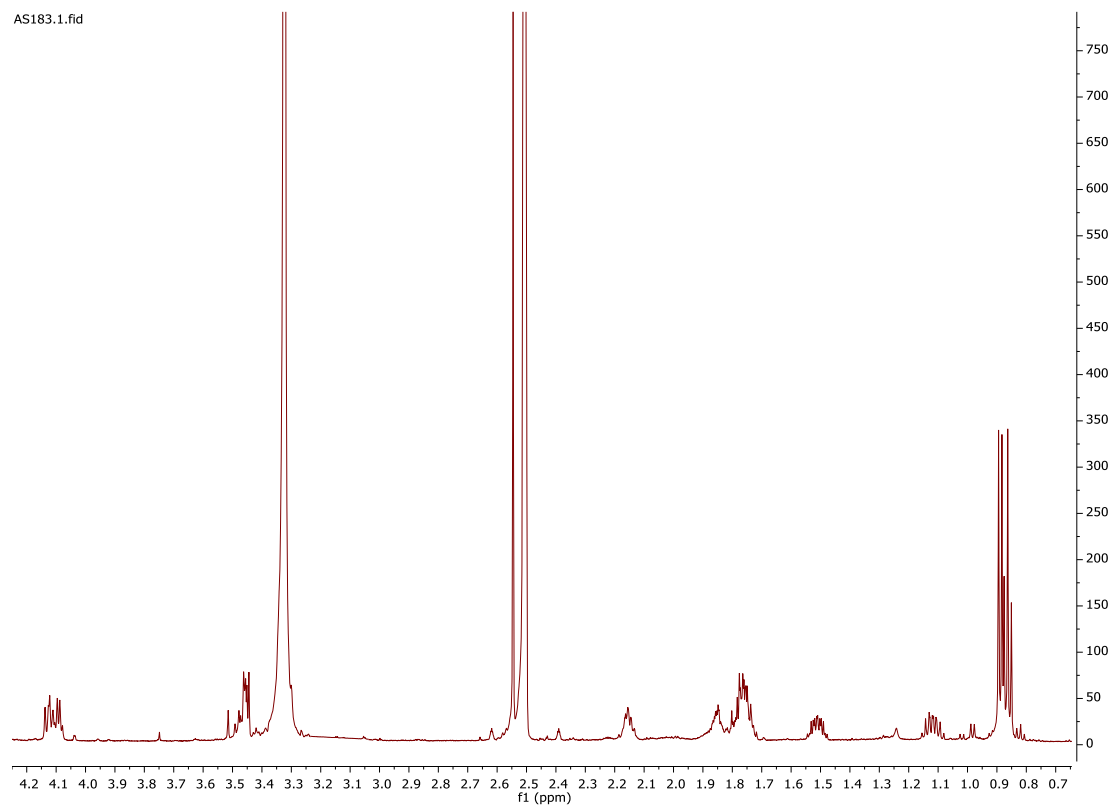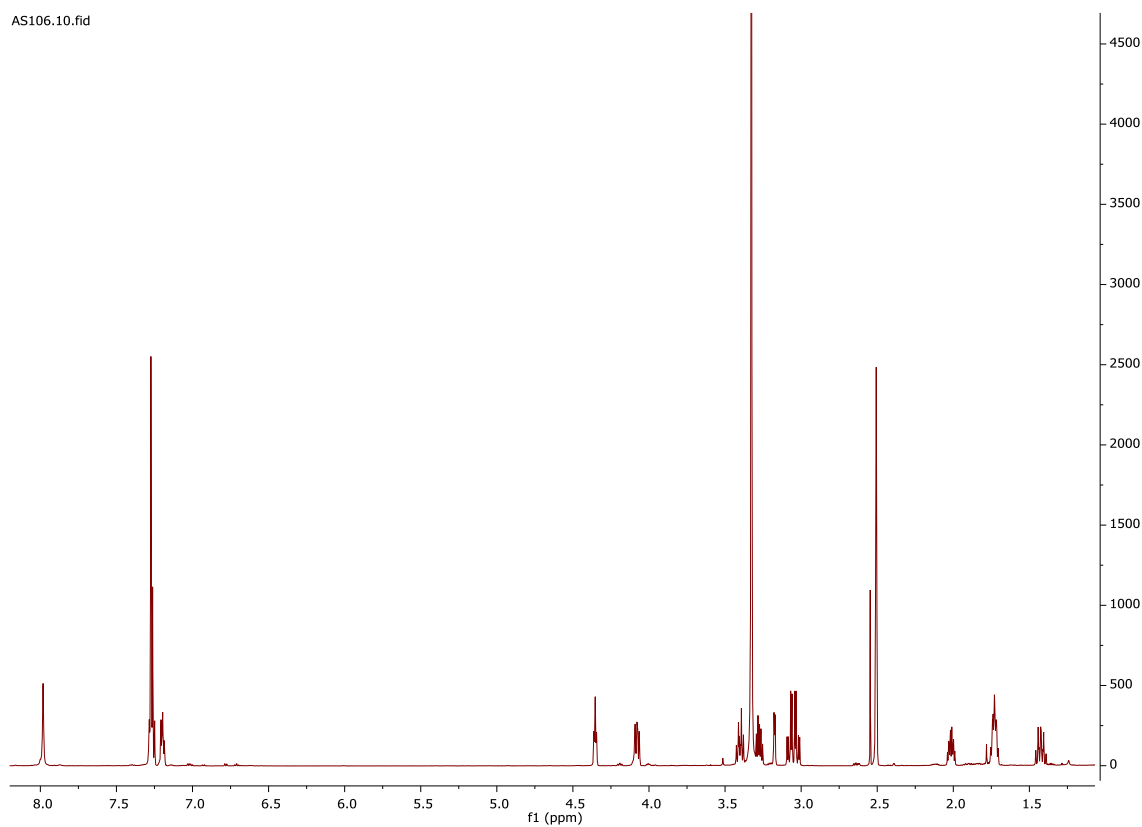

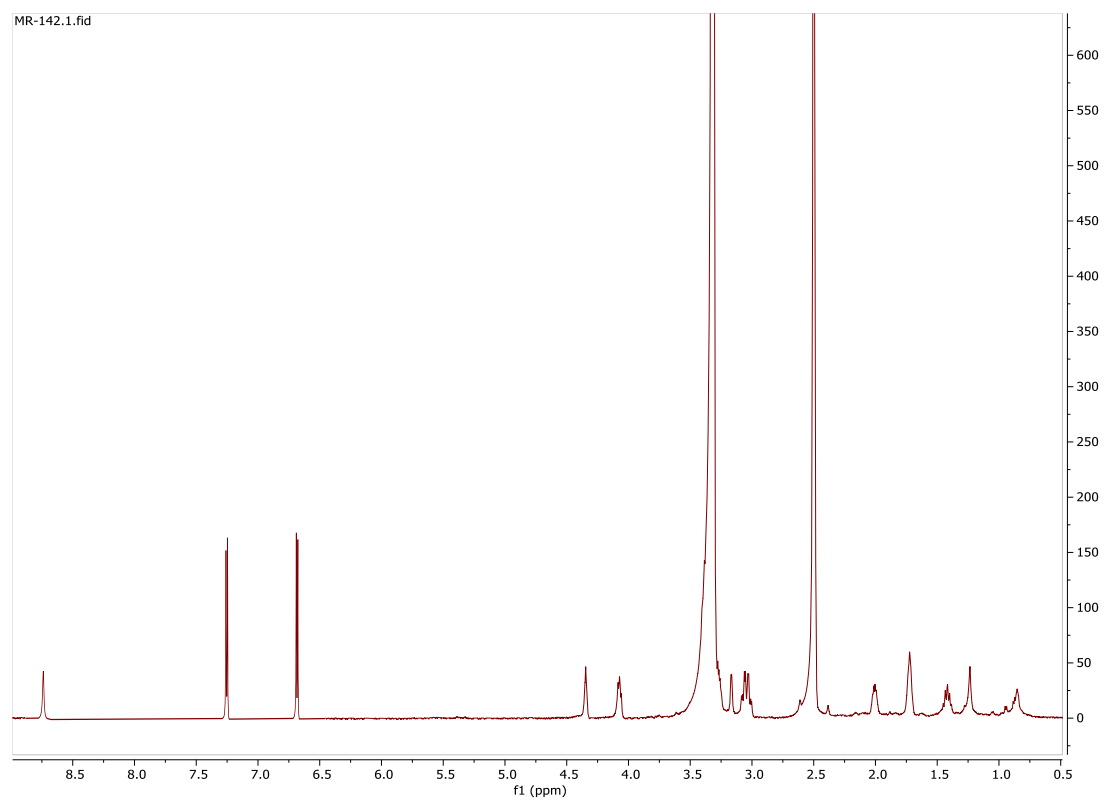

**Figure S9:** <sup>1</sup>H NMR spectrum of compound 5 (600 MHz, DMSO-*d*<sub>6</sub>, 298 K)

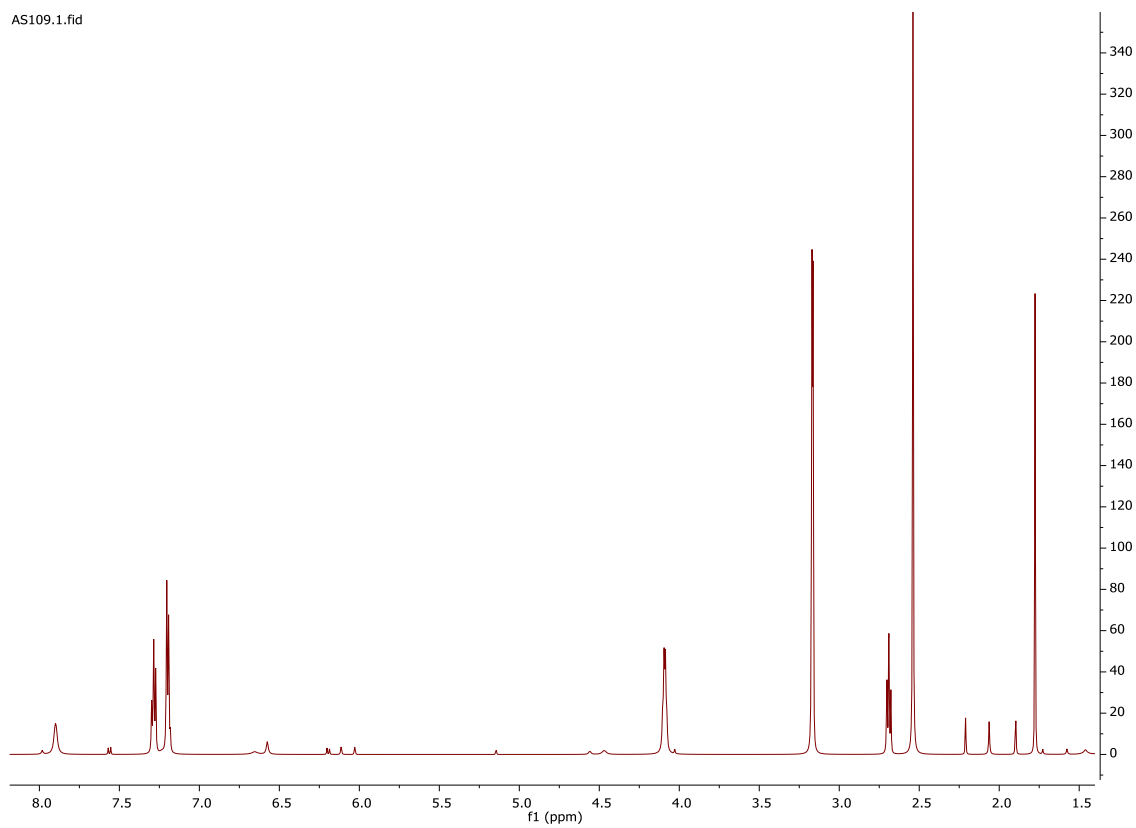

**Figure S10:** <sup>1</sup>H NMR spectrum of compound 6 (600 MHz, DMSO-*d*<sub>6</sub>, 298 K)

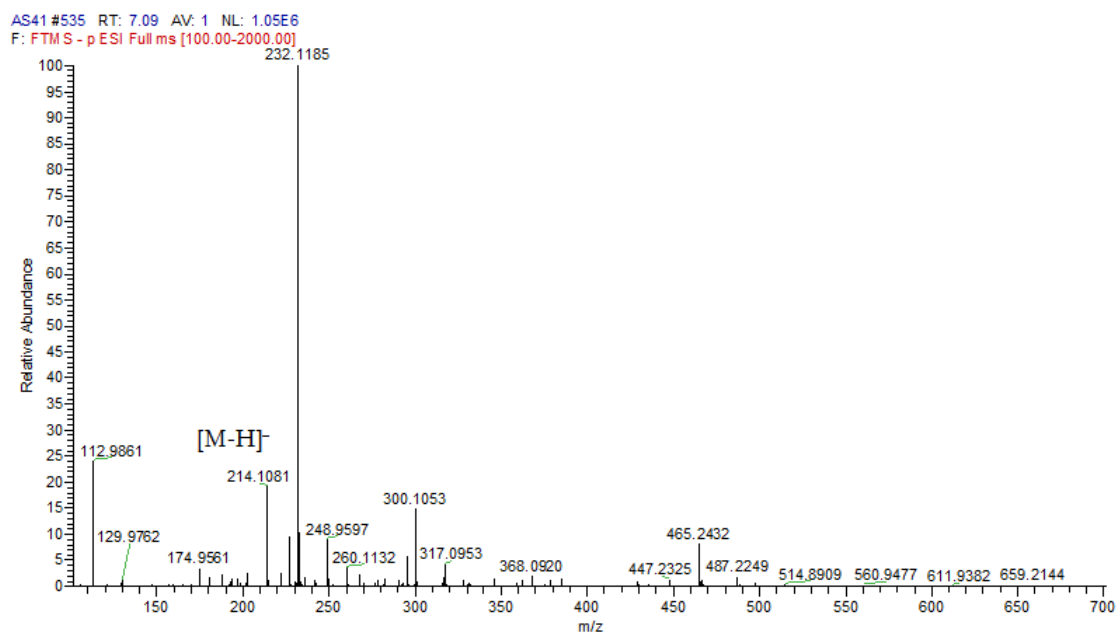

Figure S11: HRESIMS spectrum of compound 7

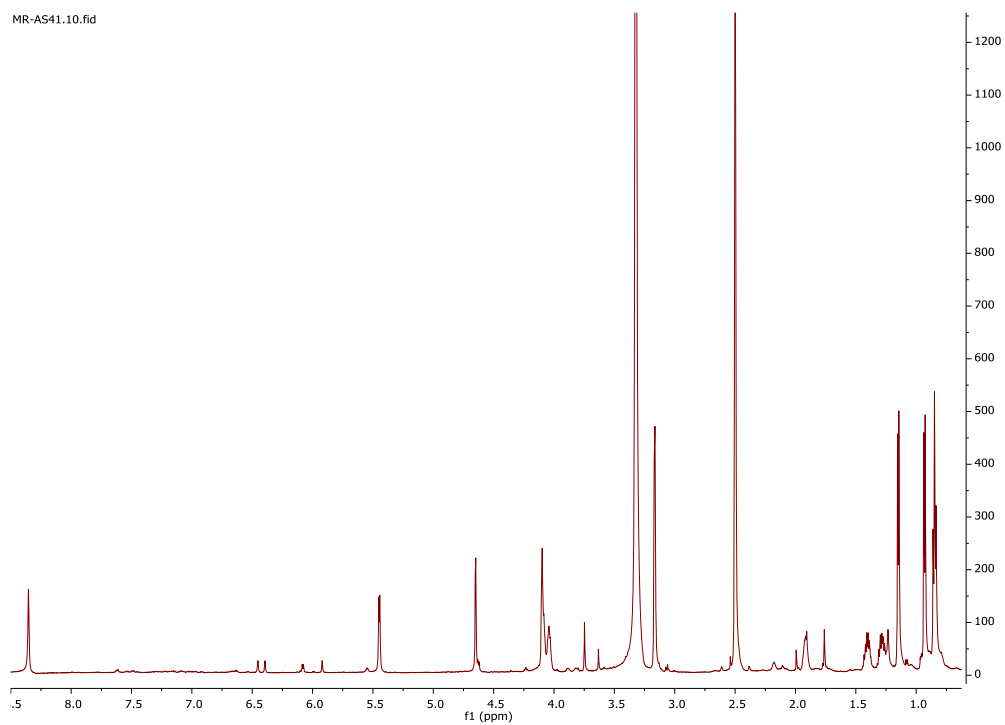

Figure S12: <sup>1</sup>H NMR spectrum of compound 7 (600 MHz, DMSO-*d*<sub>6</sub>, 298 K)



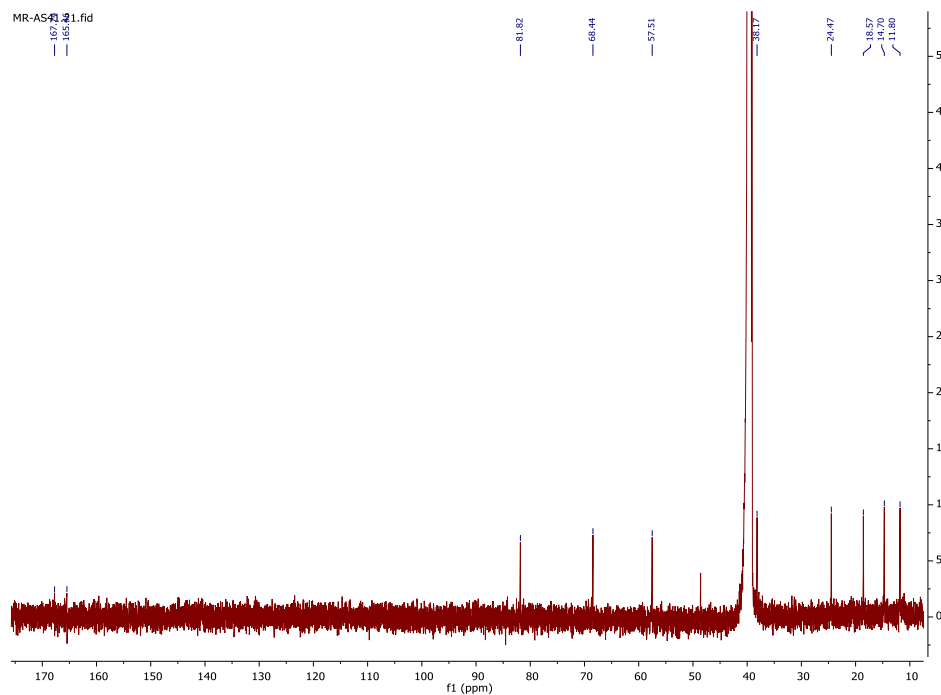

**Figure S13:**  $^{13}\text{C}$  NMR spectrum of compound **7** (600 MHz,  $\text{DMSO}-d_6$ , 298 K)

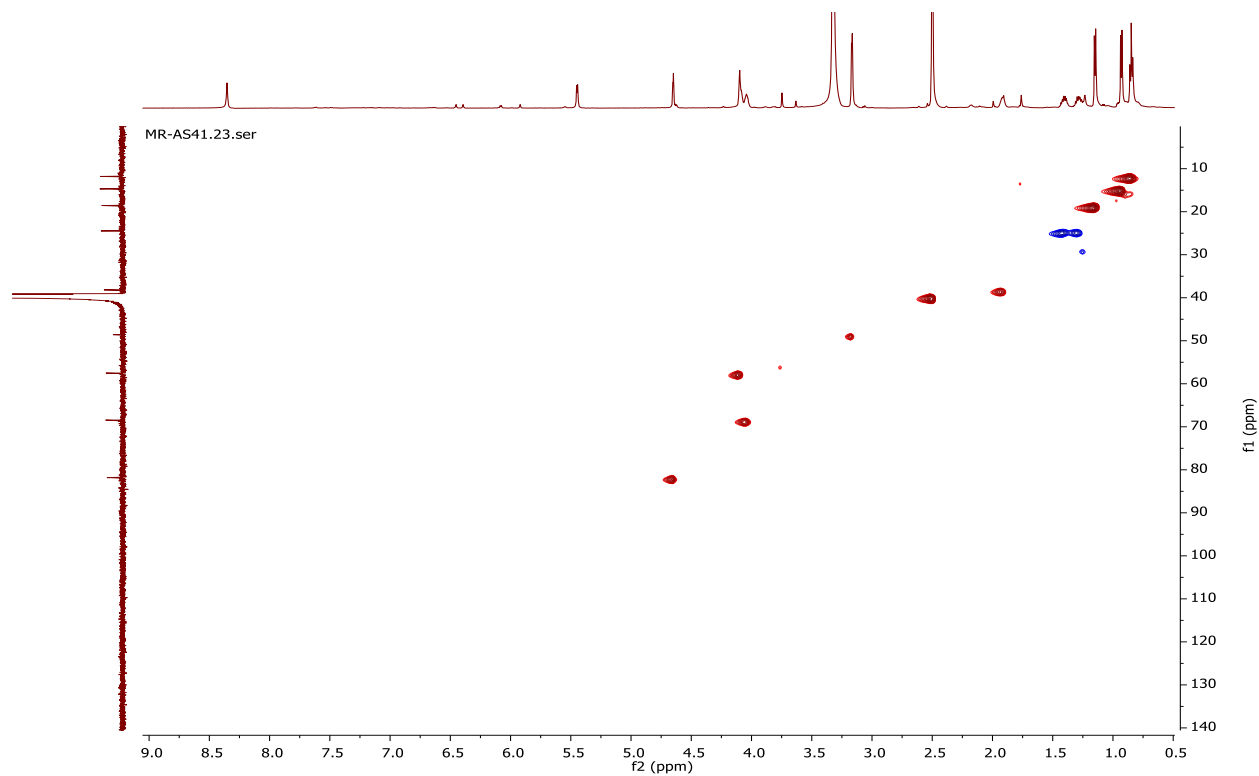

**Figure S14:** HSQC spectrum of compound **7** ( $\text{DMSO}-d_6$ , 298 K)



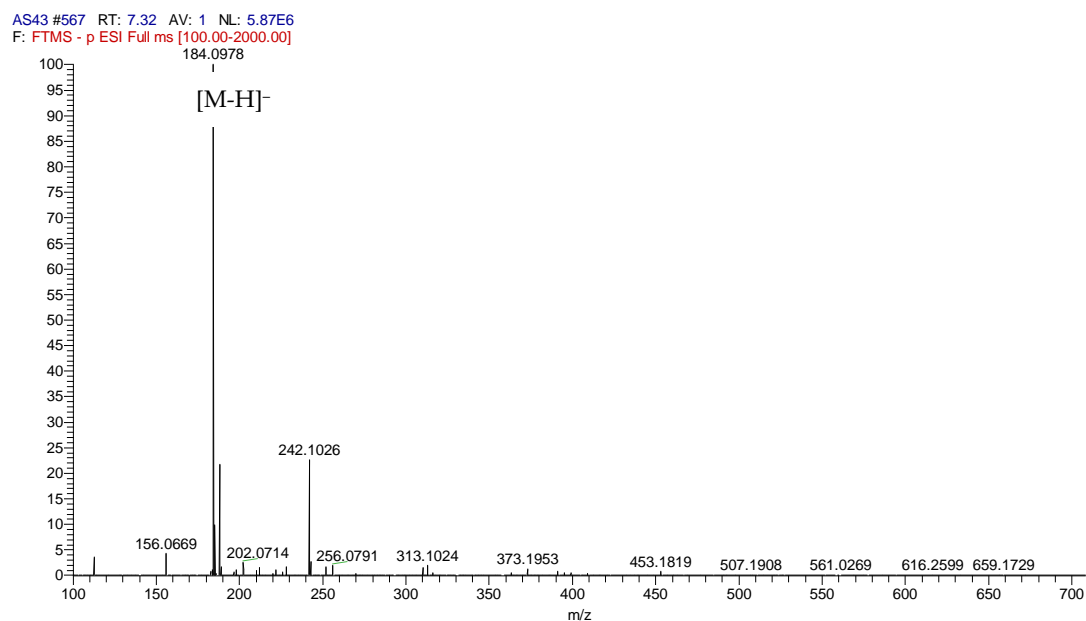

Figure S17: HRESIMS spectrum of compound 8

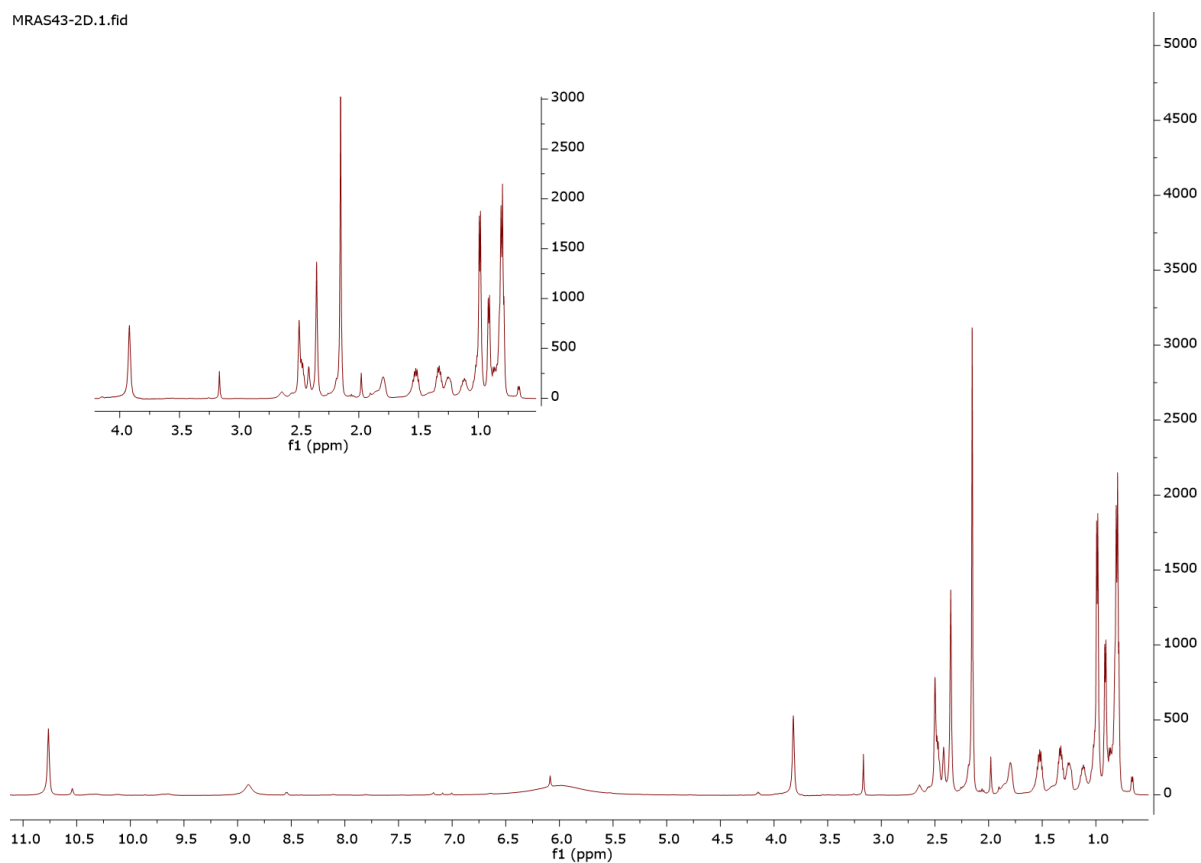

Figure S18: <sup>1</sup>H NMR spectrum of compound 8 (600 MHz, DMSO-*d*<sub>6</sub>, 298 K)

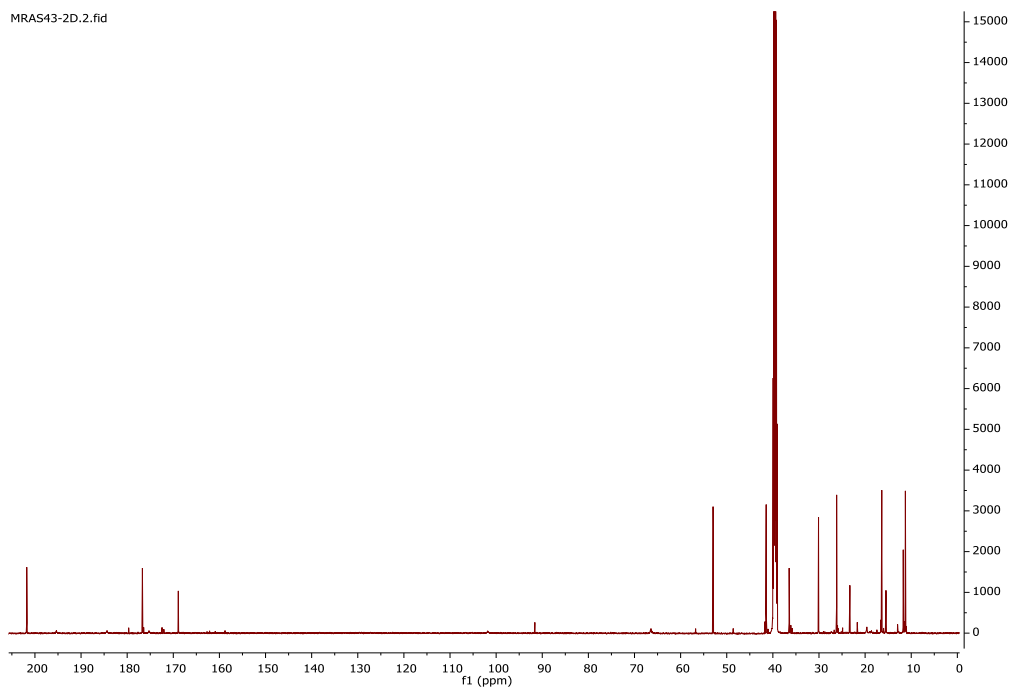

Figure S19:  $^{13}\text{C}$  NMR spectrum of compound **8** (600 MHz,  $\text{DMSO-}d_6$ , 298 K)

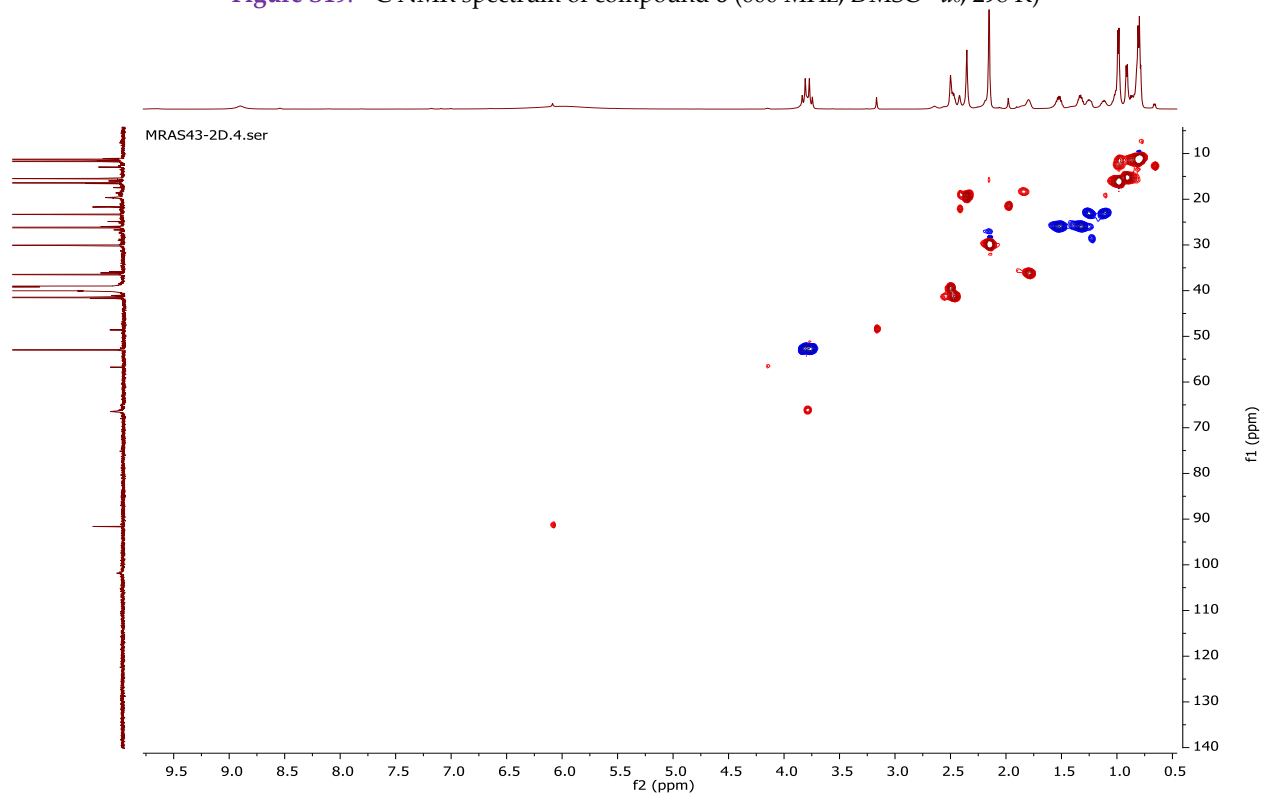

Figure S20: HSQC spectrum of compound **8** ( $\text{DMSO-}d_6$ , 298 K)

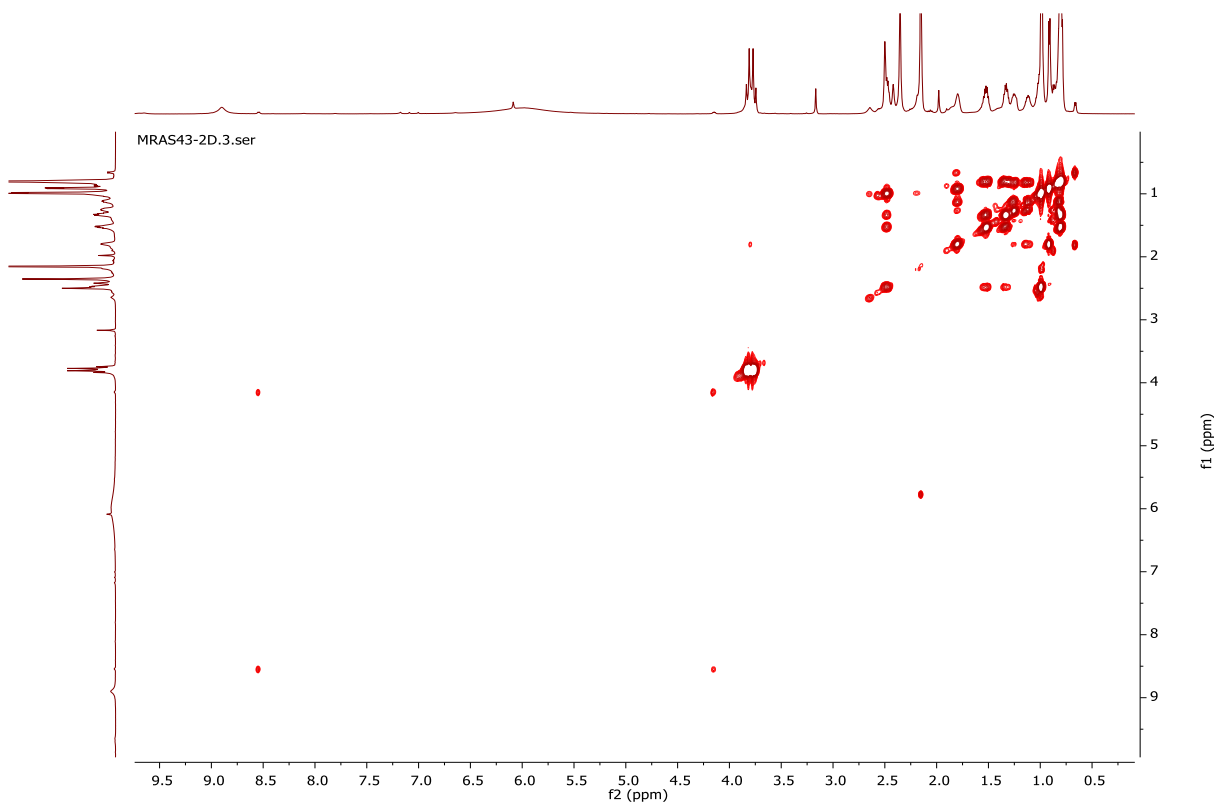

**Figure S21:**  $^1\text{H}$ - $^1\text{H}$  COSY spectrum of compound **8** (DMSO- $d_6$ , 298 K)

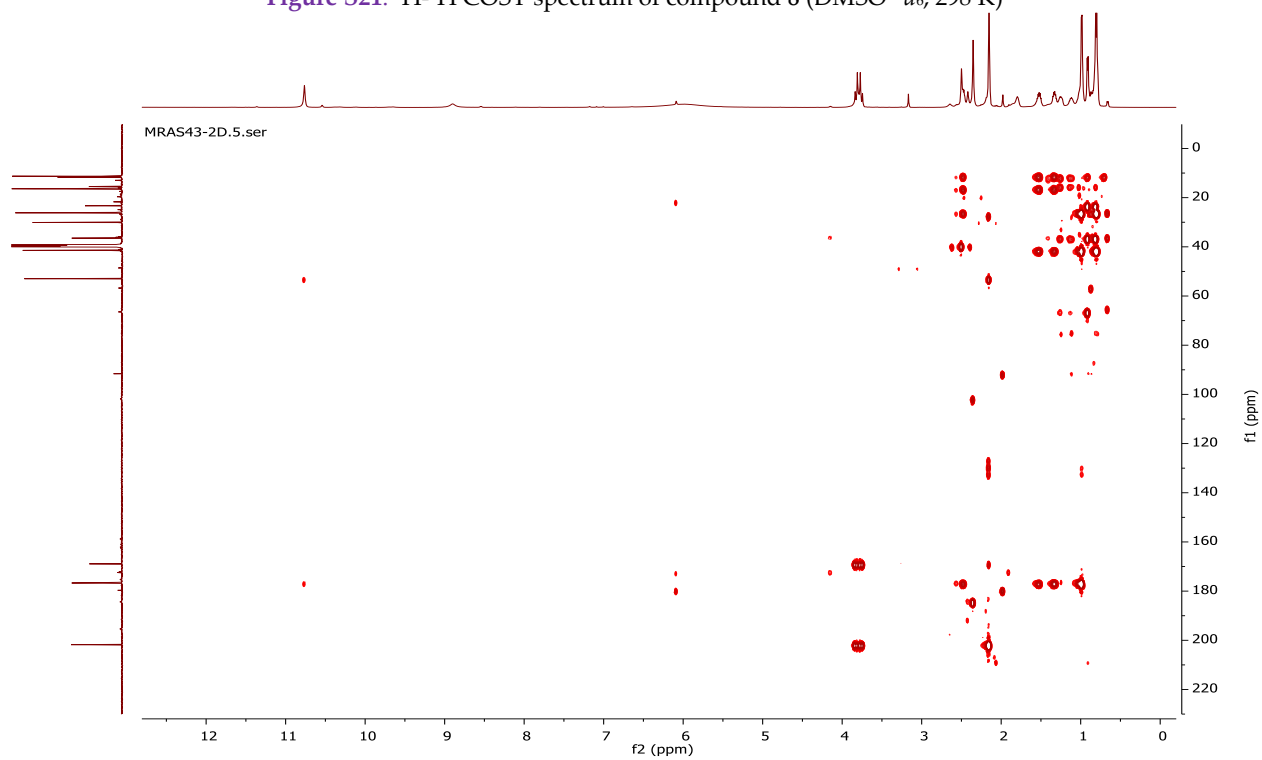

**Figure S22:** HMBC spectrum of compound **8** (DMSO- $d_6$ , 298 K)

MR-AS03.10.fid

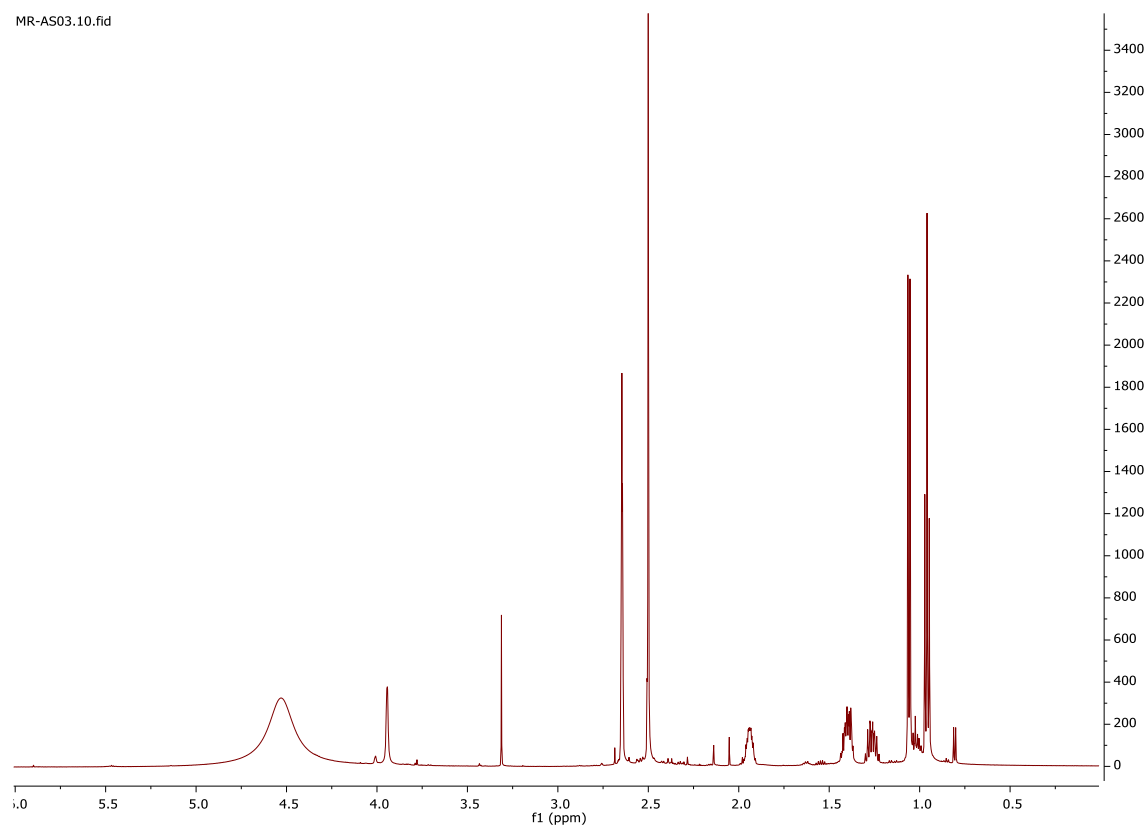

Figure S23:  $^1\text{H}$  NMR spectrum of compound **9** (600 MHz,  $\text{DMSO}-d_6$ , 298 K)

MR-AS42 2D.10.fid

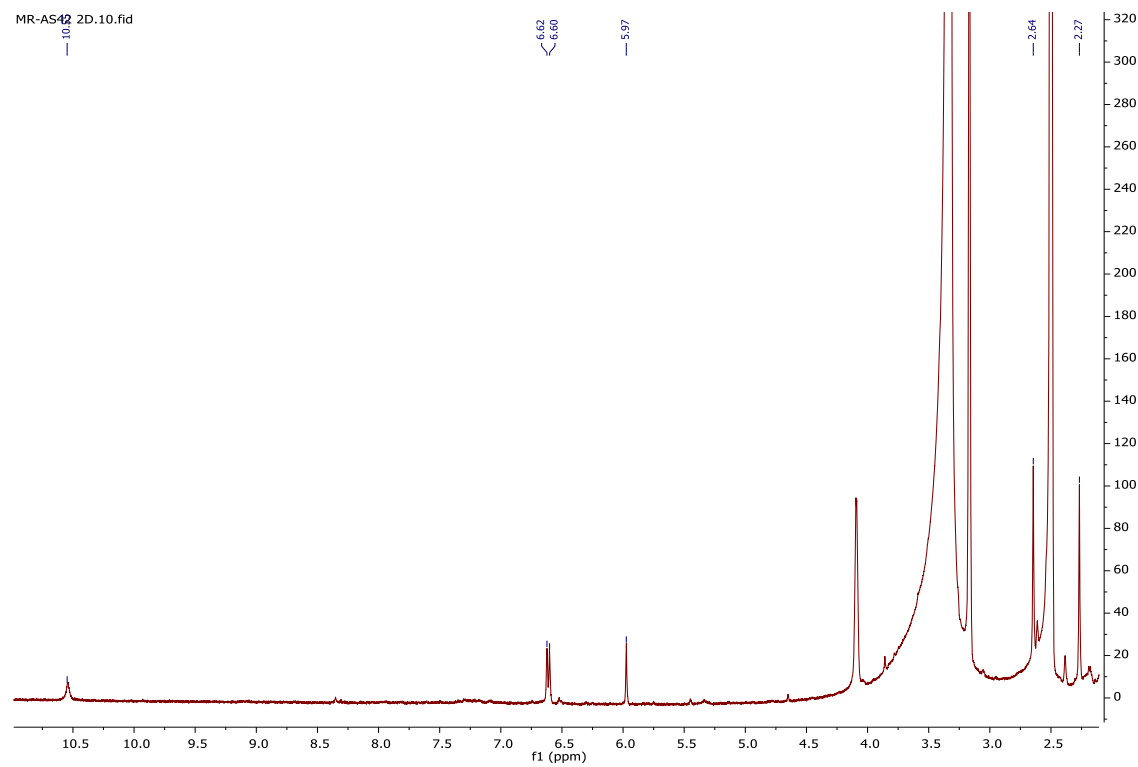

Figure S24:  $^1\text{H}$  NMR spectrum of compound **10** (600 MHz,  $\text{DMSO}-d_6$ , 298 K)

MR-AS66-2D.1.fid

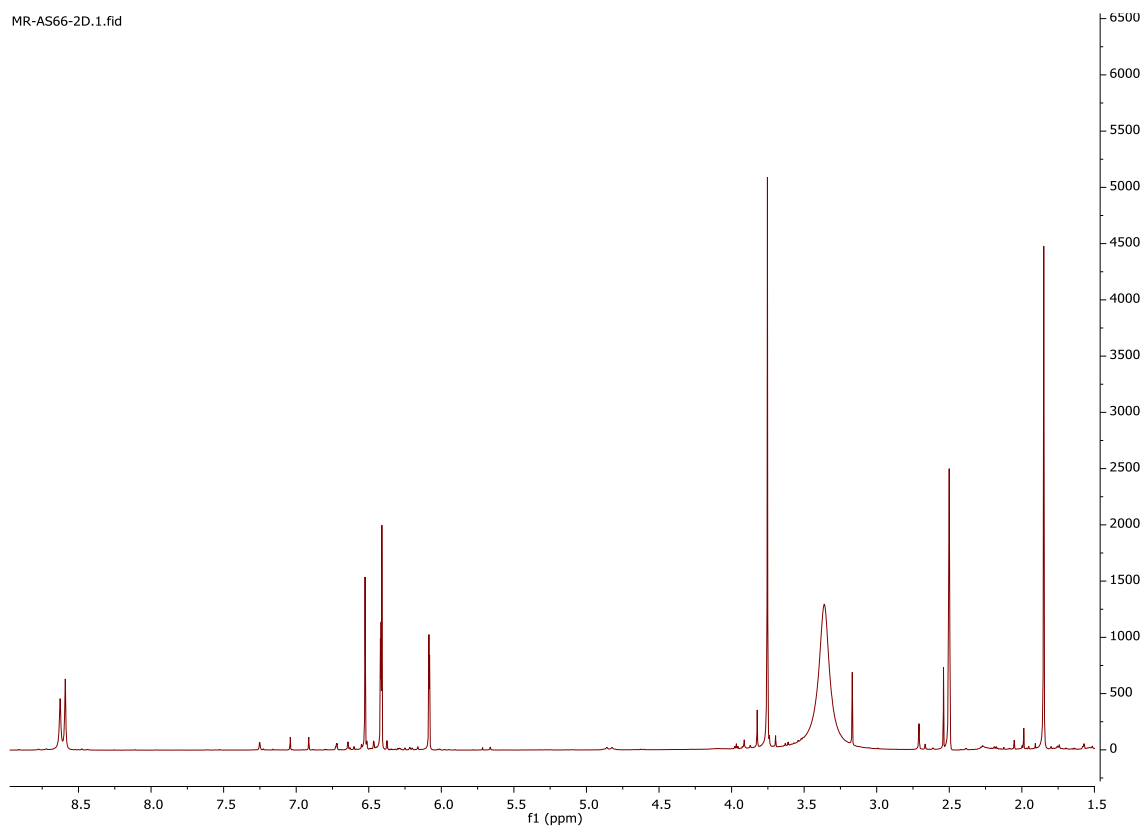

Figure S25:  $^1\text{H}$  NMR spectrum of compound **11** (600 MHz,  $\text{DMSO}-d_6$ , 298 K)

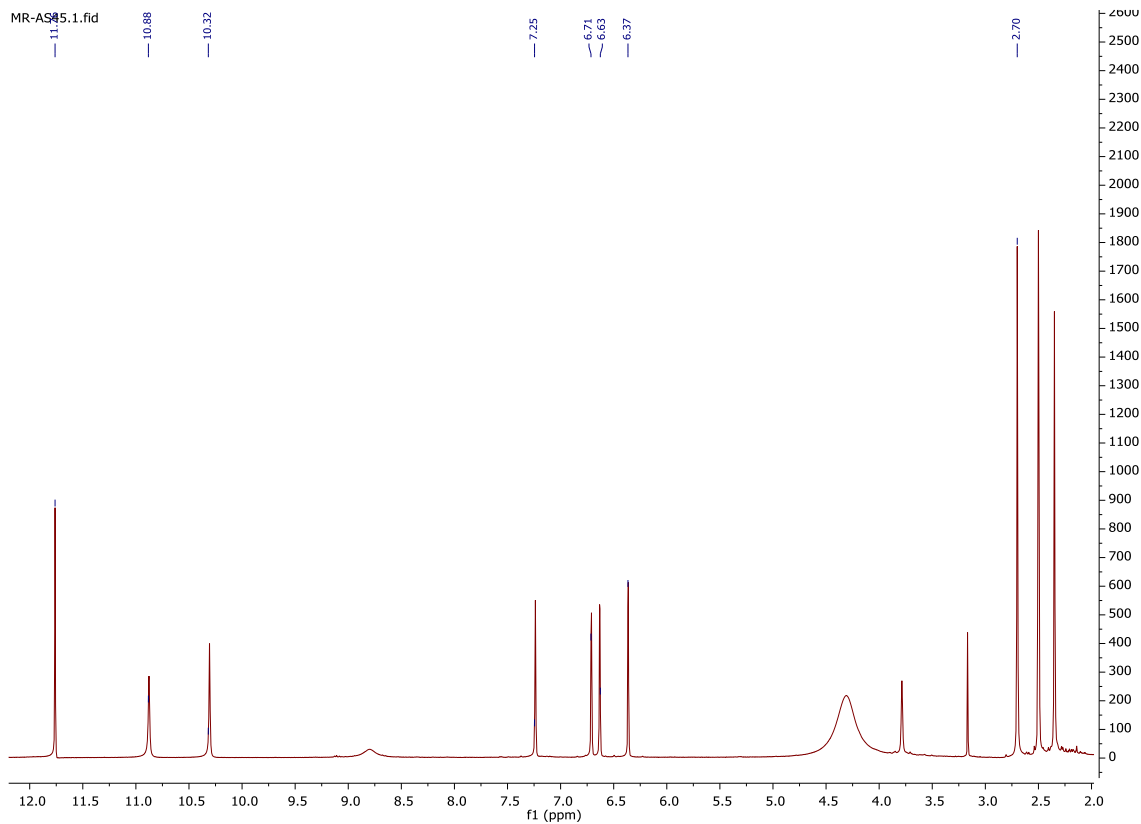

Figure S26:  $^1\text{H}$  NMR spectrum of compound **12** (600 MHz,  $\text{DMSO}-d_6$ , 298 K)

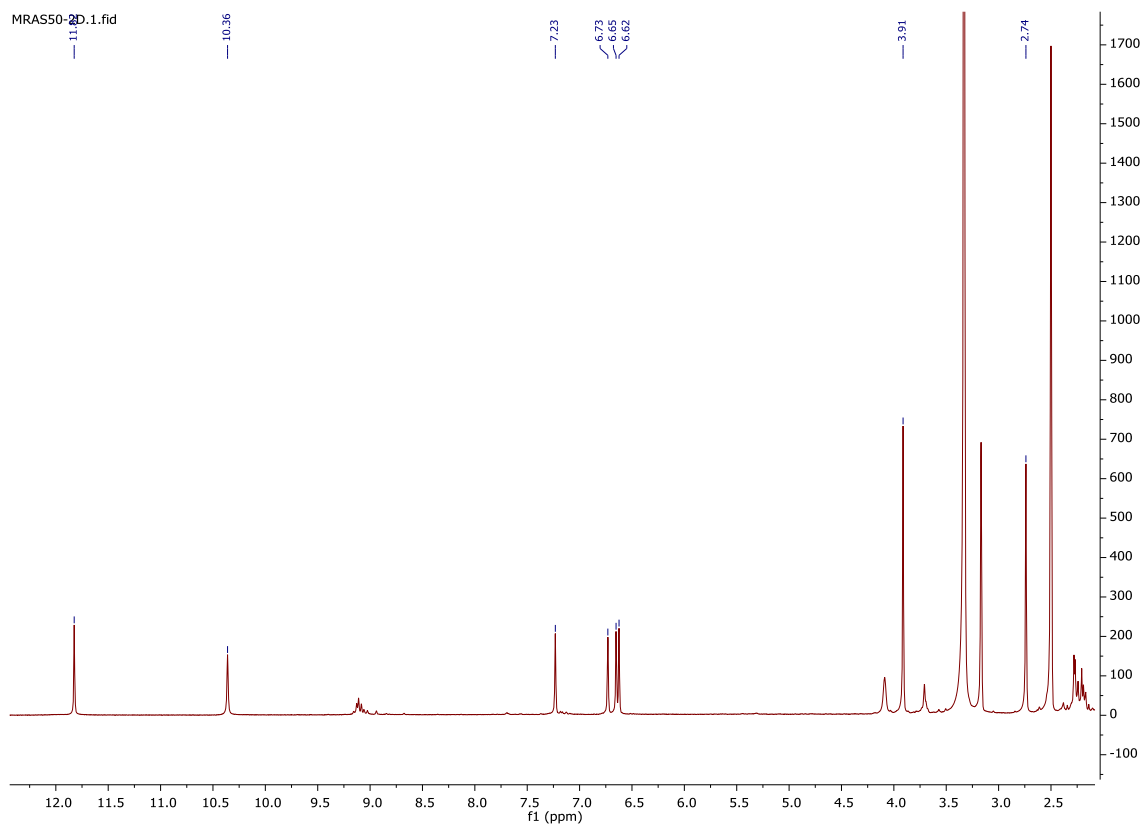

**Figure S27:**  $^1\text{H}$  NMR spectrum of compound **13** (600 MHz,  $\text{DMSO}-d_6$ , 298 K)

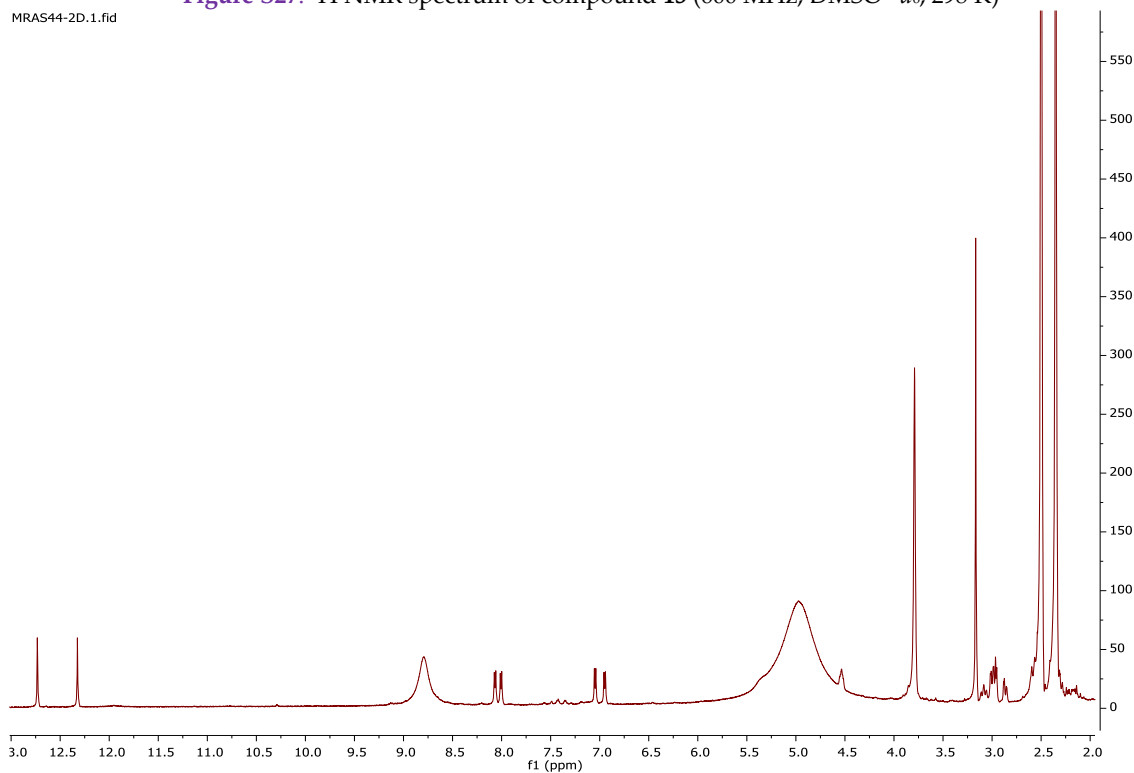

**Figure S28:**  $^1\text{H}$  NMR spectrum of compound **14** (600 MHz,  $\text{DMSO}-d_6$ , 298 K)



MR-AS46.1.fid

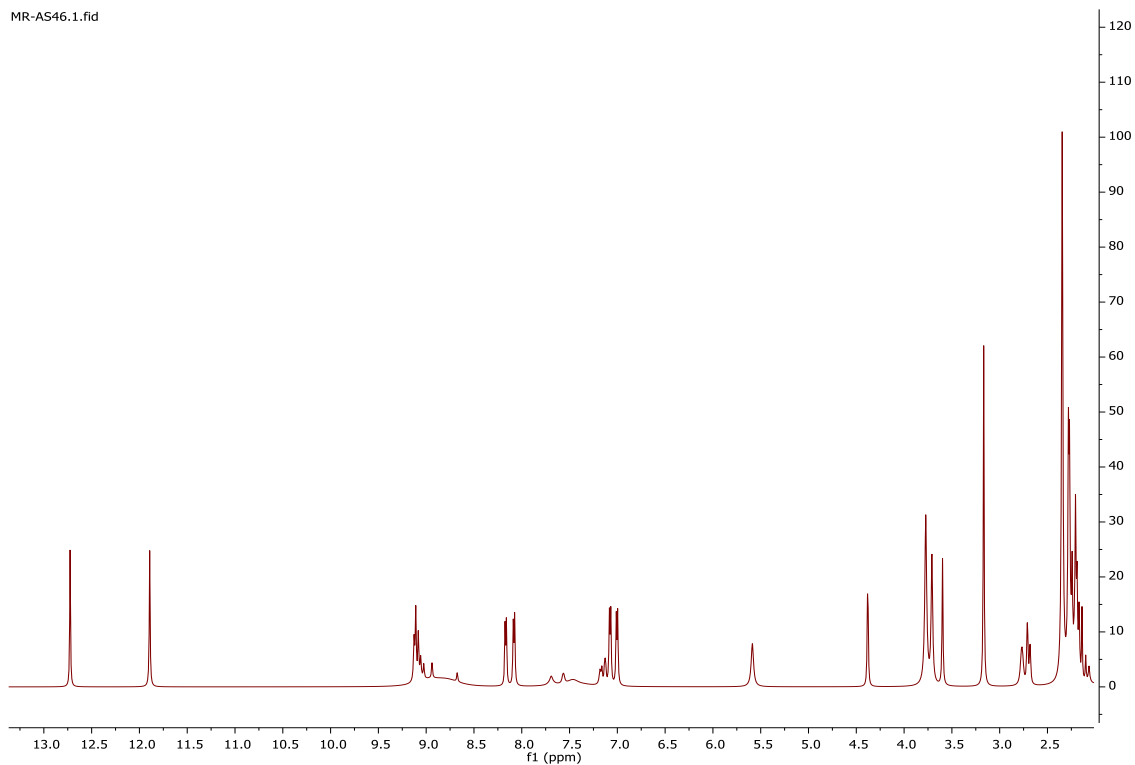

Figure S29:  $^1\text{H}$  NMR spectrum of compound **15** (600 MHz,  $\text{DMSO}-d_6$ , 298 K)

MR-AS-62.20.fid

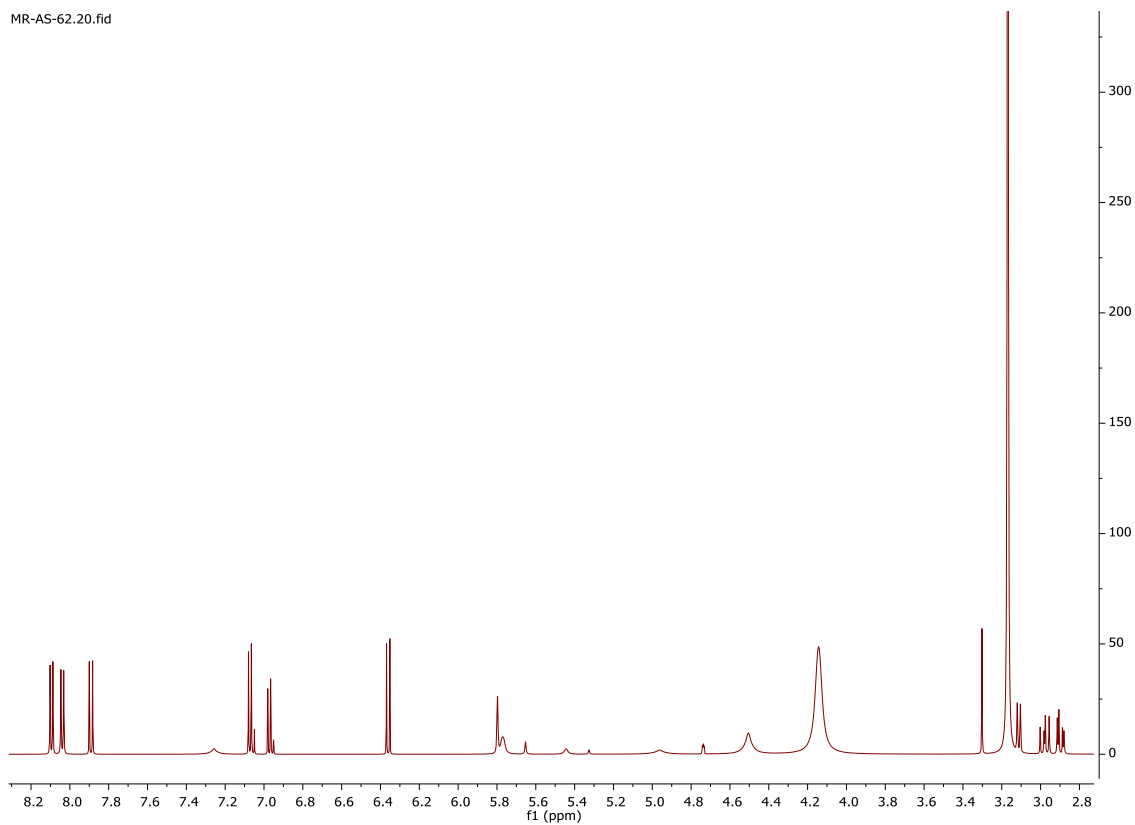

Figure S30:  $^1\text{H}$  NMR spectrum of compound **16** (600 MHz,  $\text{DMSO}-d_6$ , 298 K)
